# Supplementary material
Source: PubMed Central journal article supplement (PMC149838)
Supplement: nar_31_5_1464__1.pdf [file nar_31_5_1464__1.pdf]

## SUPPLEMENTARY MATERIAL

*Figure S1.* The crystal packing of the complex viewed down the *c* axis. The two series of continuous pseudo-helices crossing each other delimit infinite channels parallel to the *c* axis and form successive sheets of stacked duplexes aligned along the diagonals of the *a*-*b* plane.

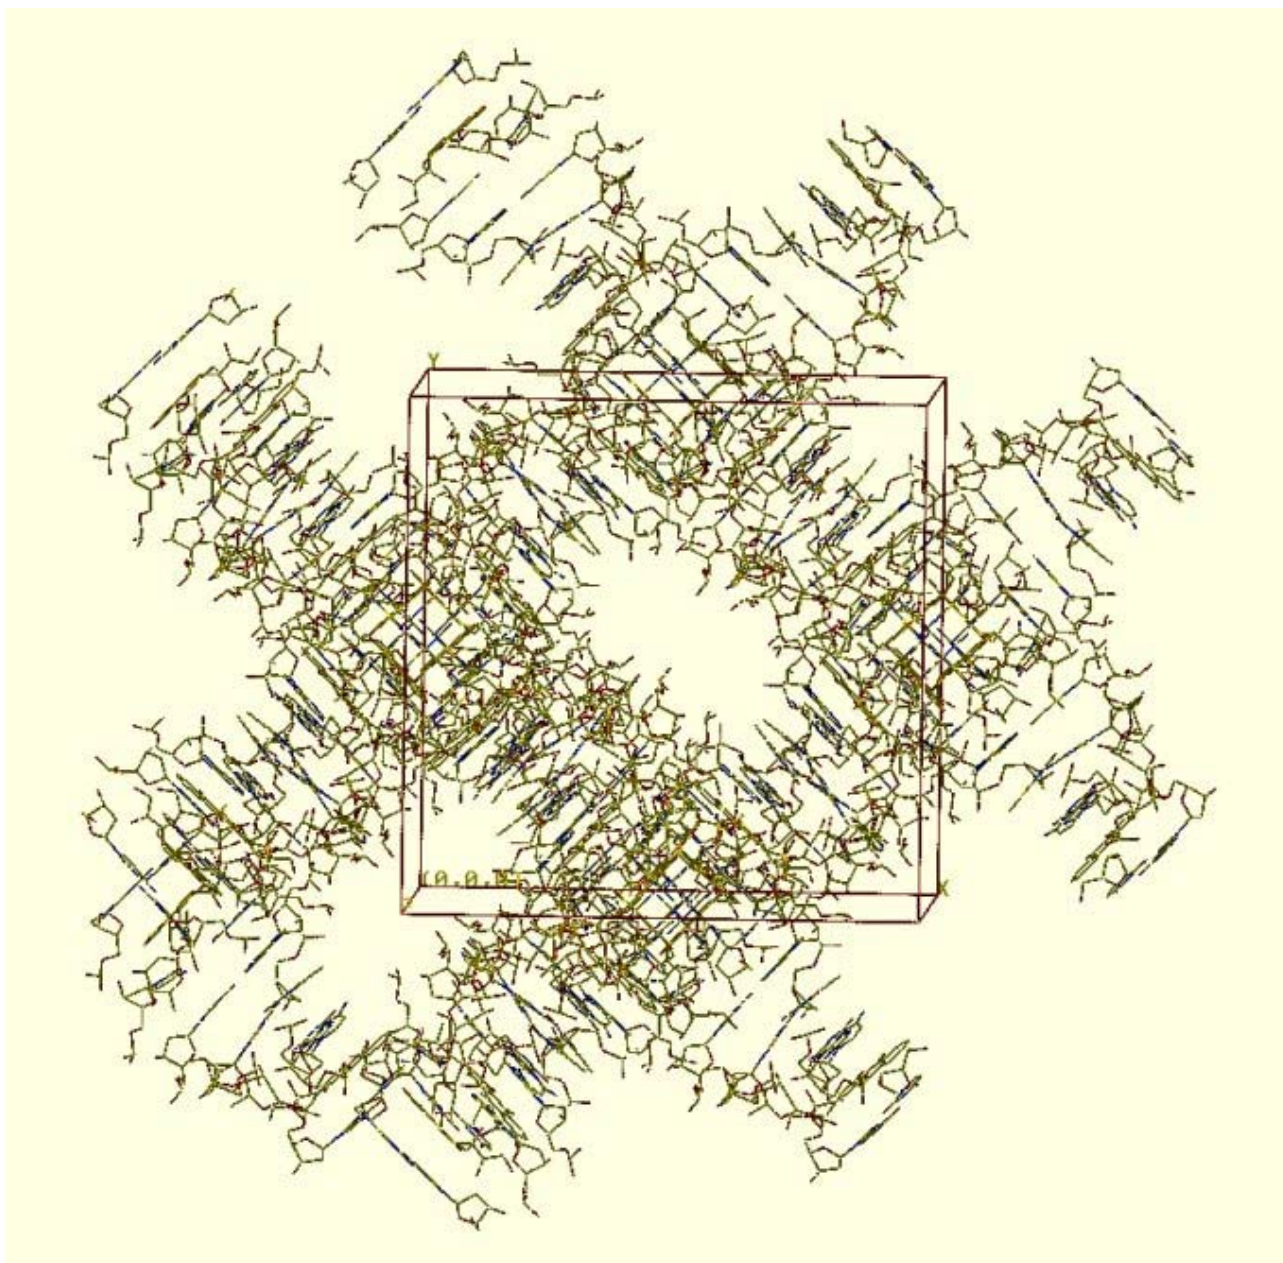

**Table S1. Torsion angles and geometrical DNA helical parameters.**

| <b>Selected torsion angles</b> |          |         |          |          |            |        |        |       |               |
|--------------------------------|----------|---------|----------|----------|------------|--------|--------|-------|---------------|
| Residue                        | $\alpha$ | $\beta$ | $\gamma$ | $\delta$ | $\epsilon$ | $\xi$  | $\chi$ | P     | Ribose pucker |
| C1                             |          |         | 155.5    | 150.0    | -142.0     | -32.4  | 162.2  | 221.0 | C4'-endo      |
| G2                             | -94.1    | 156.7   | 55.9     | 138.8    | -132.6     | 174.0  | -109.1 | 141.4 | C1'-exo       |
| A3                             | -51.4    | 136.1   | 50.9     | 133.0    | -180.0     | -99.0  | -115.8 | 144.2 | C2'-endo      |
| T4                             | -53.8    | 166.3   | 46.6     | 117.8    | -162.3     | -93.8  | -116.1 | 121.1 | C1'-exo       |
| C5                             | -55.9    | 169.8   | 40.2     | 149.3    | -122.7     | 156.9  | -75.5  | 153.9 | C2'-endo      |
| G6                             | -29.6    | 159.9   | 24.5     | 153.4    |            |        | -78.4  | 174.8 | C2'-endo      |
| C7                             |          |         | 70.5     | 97.0     | -157.9     | -75.1  | -151.7 | 103.1 | O1'-endo      |
| G8                             | -77.1    | -171.0  | 70.5     | 130.3    | -138.8     | -176.9 | -99.9  | 144.8 | C2'-endo      |
| T9                             | -42.9    | 140.3   | 34.3     | 139.8    | -177.3     | -91.8  | -113.4 | 187.4 | C3'-exo       |
| A10                            | -49.4    | 169.3   | 30.2     | 122.5    | -158.7     | -94.7  | -106.6 | 134.3 | C1'-exo       |
| C11                            | -54.4    | 151.3   | 35.7     | 130.0    | -86.1      | 159.7  | -82.5  | 140.0 | C1'-exo       |
| G12                            | -92.2    | 170.5   | 60.4     | 143.2    |            |        | -93.6  | 170.4 | C2'-endo      |

  

| <b>Helical parameters</b> |          |          |            |             |            |              |          |
|---------------------------|----------|----------|------------|-------------|------------|--------------|----------|
| Base-pair                 | Roll (°) | Tilt (°) | Inclin (°) | Prop Tw (°) | Buckle (°) | Helic Tw (°) | Rise (°) |
| C1/G12                    |          |          | 2.3        | -1.3        | 12.9       |              |          |
|                           | -2.7     | -2.8     |            |             |            | 32.2         | 7.5      |
| G2/C11                    |          |          | 0.03       | -0.8        | -28.5      |              |          |
|                           | 0.6      | -6.8     |            |             |            | 36.2         | 2.7      |
| A3/T10                    |          |          | -1.9       | -17.8       | -8.5       |              |          |
|                           | 2.9      | -6.0     |            |             |            | 27.8         | 3.3      |
| T4/A9                     |          |          | -4.7       | -3.0        | 0.98       |              |          |
|                           | 6.0      | 7.2      |            |             |            | 33.7         | 3.1      |
| C5/G8                     |          |          | -1.6       | 6.1         | 13.6       |              |          |
|                           | -2.8     | -2.0     |            |             |            | 27.9         | 6.9      |
| G6/C7                     |          |          | -1.5       | 0.3         | -1.8       |              |          |

These parameters were obtained from the program Curves 5.3 provided by R. Lavery (1) and are defined in accordance with EMBO workshop guidelines (2).

## REFERENCES

1. Lavery, R. and Sklenar, H. (1989) Defining the structure of irregular nucleic acids: convention and principles. *J. Biomol. Struct. Dyn.*, **6**, 655–667.
2. Dickerson, R.E., Bansal, M., Calladine, C.R., Diekmann, S., Unter, W.N., Kennard, O., van Kitzing, E., Laury, R., Nelson, H.C.M., Olson, W.K., Saenger, W., Shakked, Z., Sklenar, H., Soumpasis, D.M., Tung, C.S., Wang, A.K.J. and Zurkin, W.B. (1989) Definition and nomenclature of nucleic acid structure components. *Nucleic Acids Res.*, **17**, 1797–1803.
